# Supplementary material for: A non-heme cationic Fe(iii)-complex intercalated in montmorillonite K-10: synthesis, characterization and catalytic alkane hydroxylation with H2O2 at room temperature
Source: Royal Society of Chemistry journal article supplement (doi:10.1039/c4cy00453a), 2014-01-01
Supplement: c4cy00453a1.pdf [file c4cy00453a1.pdf]

## Supplementary Information

### **A Non-heme Cationic Fe<sup>3+</sup>-complex Intercalated in Montmorillonite K-10: Synthesis, Characterization and Catalytic Alkane Hydroxylation with H<sub>2</sub>O<sub>2</sub> at Room Temperature**

Anand Pariyar,<sup>a</sup> Suranjana Bose,<sup>a</sup> Achintesh Narayan Biswas,<sup>b</sup> Sudip Barman,<sup>c</sup> Pinaki Bandyopadhyay\*<sup>a</sup>

<sup>a</sup>Department of Chemistry, University of North Bengal, Siliguri 734013, West Bengal, India.

<sup>b</sup>Department of Chemistry, Siliguri College, Siliguri 734001, West Bengal, India.

<sup>c</sup> School of Chemical Science, National Institute of Science Education and Research (NISER ), Bhubaneswar, Orissa 751005, India.

\*Email: [chempb@gmail.com](mailto:chempb@gmail.com)

## Table of Contents

|                                                                                      | Page No |
|--------------------------------------------------------------------------------------|---------|
| Solid state uv-visible spectra of <b>1</b> , <b>Mont</b> and <b>1-Mont</b> .....     | S3      |
| Powder XRD pattern of <b>1</b> , <b>Mont</b> and <b>1-Mont</b> .....                 | S3      |
| FT-IR spectra of <b>1</b> , <b>Mont</b> and <b>1-Mont</b> .....                      | S4      |
| X-band EPR spectra of <b>1</b> and <b>1-Mont</b> .....                               | S4      |
| Time course reaction profile of cyclohexane oxidation.....                           | S5      |
| Time course reaction profile of cyclooctane oxidation.....                           | S5      |
| Time course reaction profile of cyclooctane oxidation.....                           | S6      |
| Rate of cyclohexane oxidation by <b>1</b> , <b>Mont</b> and <b>1-Mont</b> .....      | S6      |
| Effect of H <sub>2</sub> O <sub>2</sub> concentration on cyclohexane oxidation ..... | S7      |
| Effect of <b>1-Mont</b> concentration on cyclohexane oxidation.....                  | S7      |
| Effect of substrate concentration on cyclohexane oxidation .....                     | S8      |

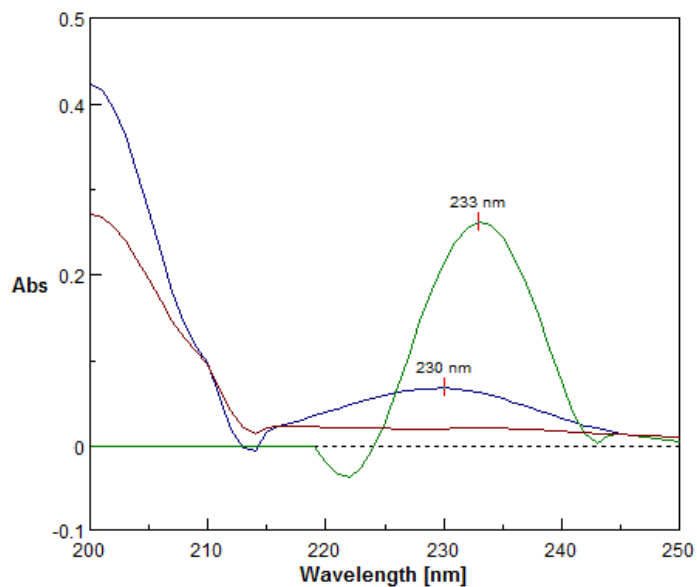

Figure S1. Solid state uv-visible spectra of **1** (green), **Mont** (red) and **1-Mont** (blue) in KBr disc. The curve was obtained using Savitzky-Golay algorithm with 1<sup>st</sup> order of derivative over 25 data points with 3<sup>rd</sup> order polynomial fit.

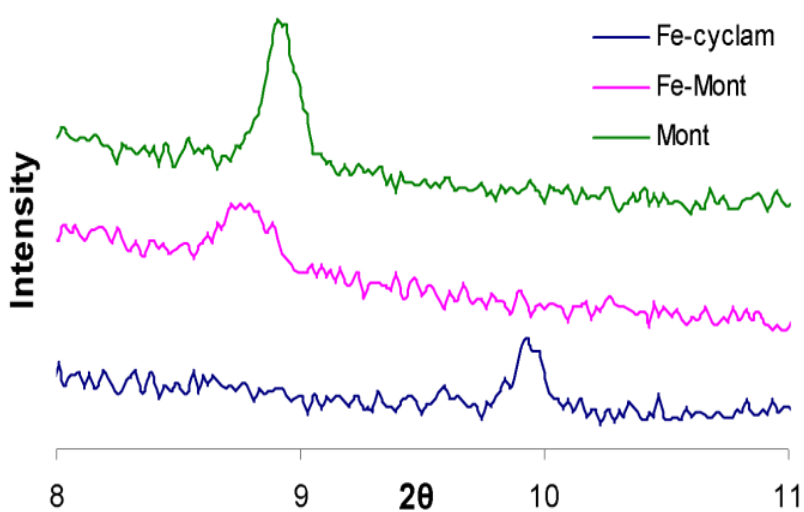

Figure S2. PXRD pattern of **Montmorillonite K-10 (Mont)**, **1(Fe-cyclam)** and **1-Mont (Fe-Mont)** at small angle.

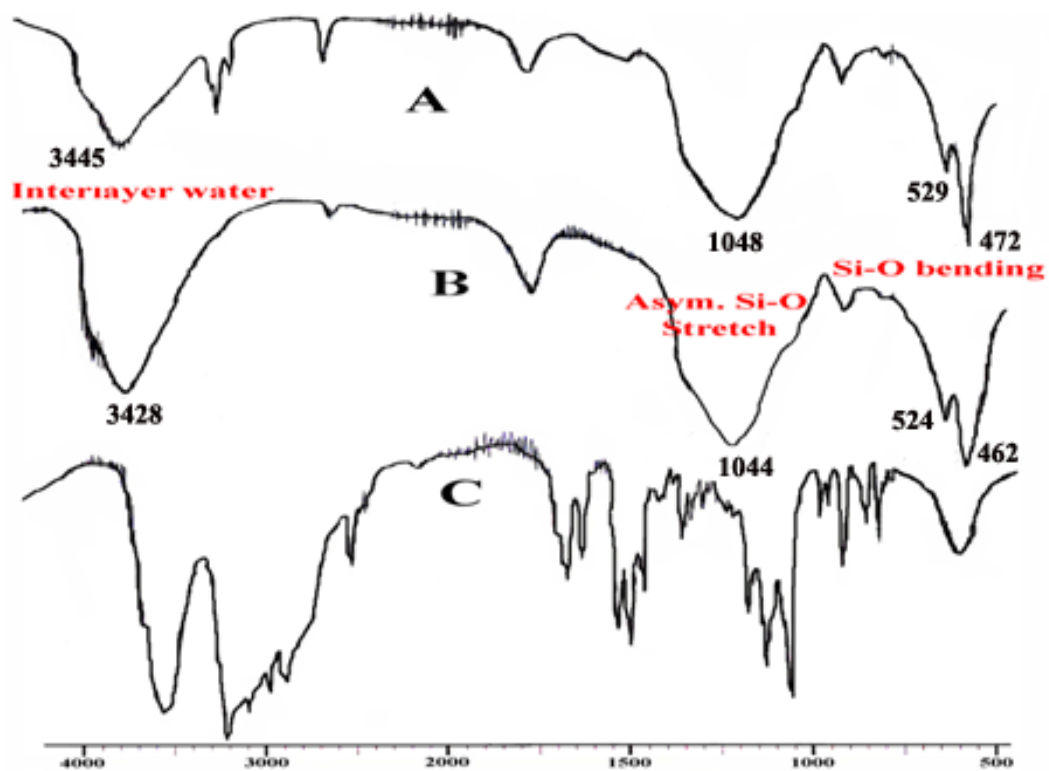

Figure S3. FT-IR spectra of **1-Mont** (A), **Montmorillonite K-10**(B), and **1** (C) in KBr disc.

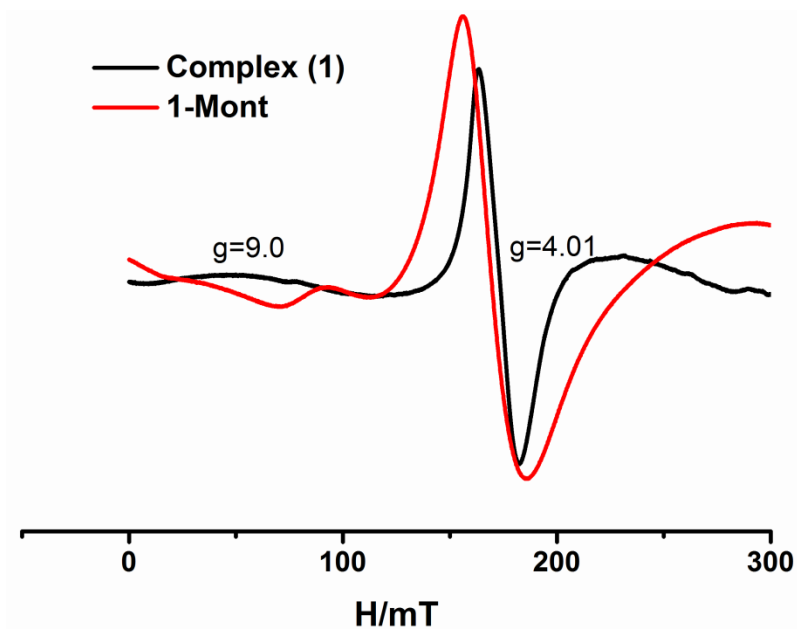

Figure S4. X-band EPR spectra recorded in the solid state at 77K of *cis*-[Fe<sup>III</sup>(cyclam)Cl<sub>2</sub>]Cl (black line) and **1-Mont** (red line).

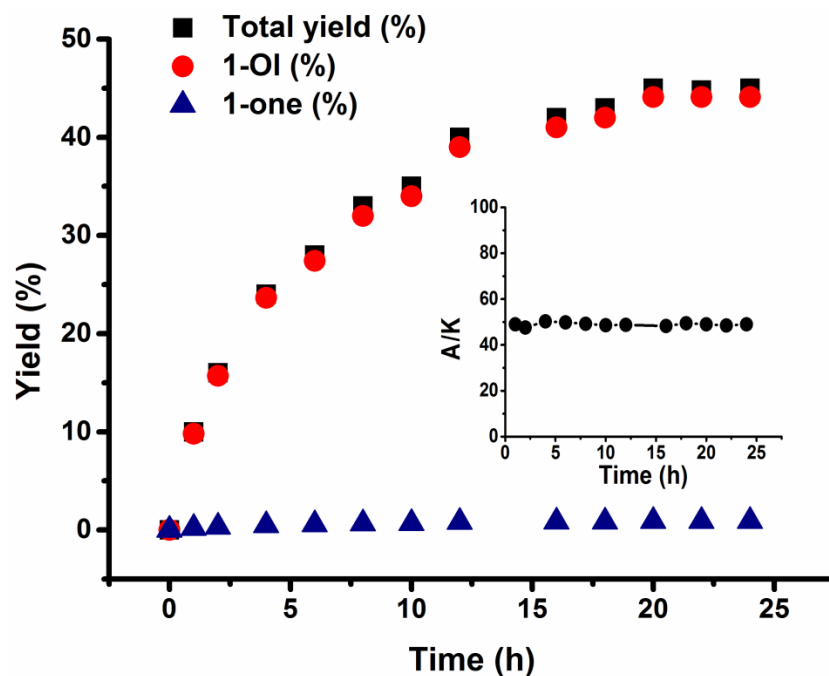

Figure S5. Accumulation of products in oxidation of cyclohexane by **1-Mont**/H<sub>2</sub>O<sub>2</sub> with time at room temperature. (Inset: Change of A/K ratio with time)

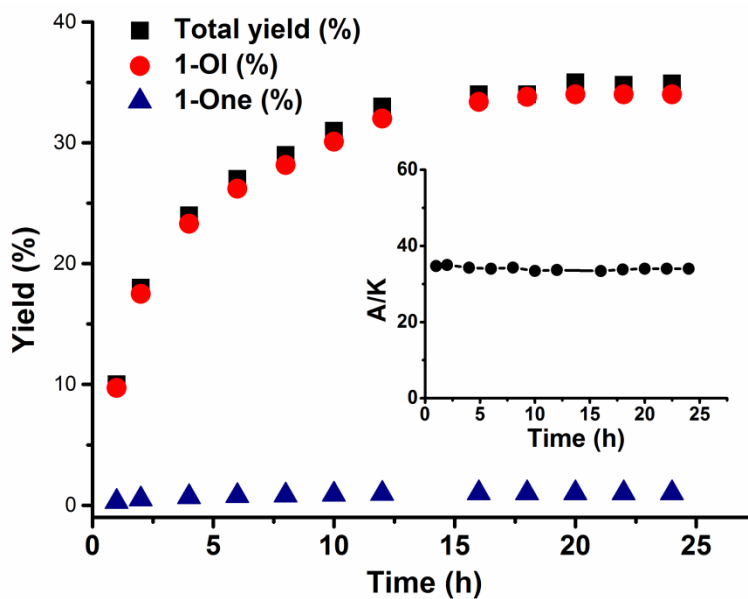

Figure S6. Accumulation of products in oxidation of cyclooctane by **1-Mont**/H<sub>2</sub>O<sub>2</sub> with time at room temperature. (Inset: Change of A/K ratio with time)

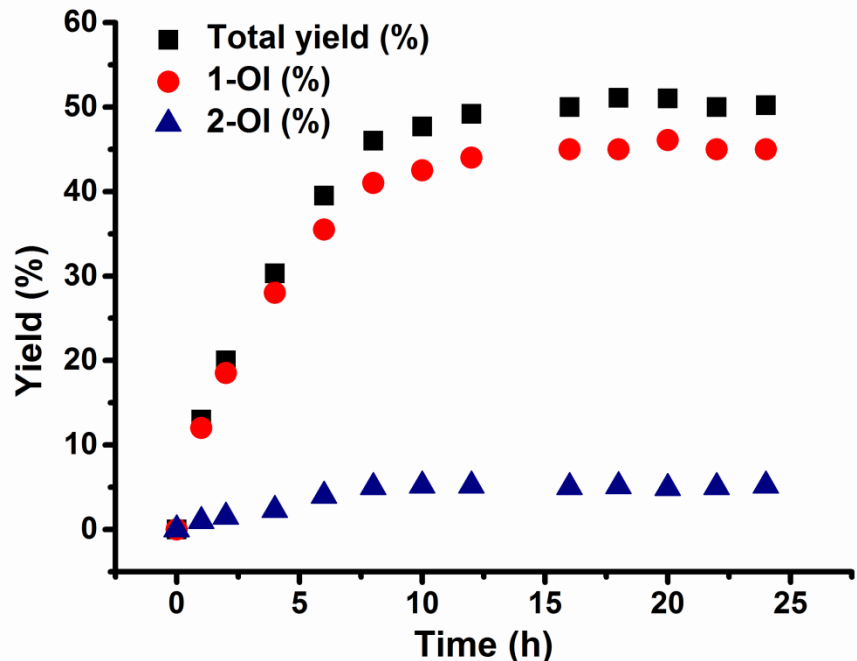

Figure S7. Accumulation of products in oxidation of adamantane by **1-Mont**/H<sub>2</sub>O<sub>2</sub> with time at room temperature.

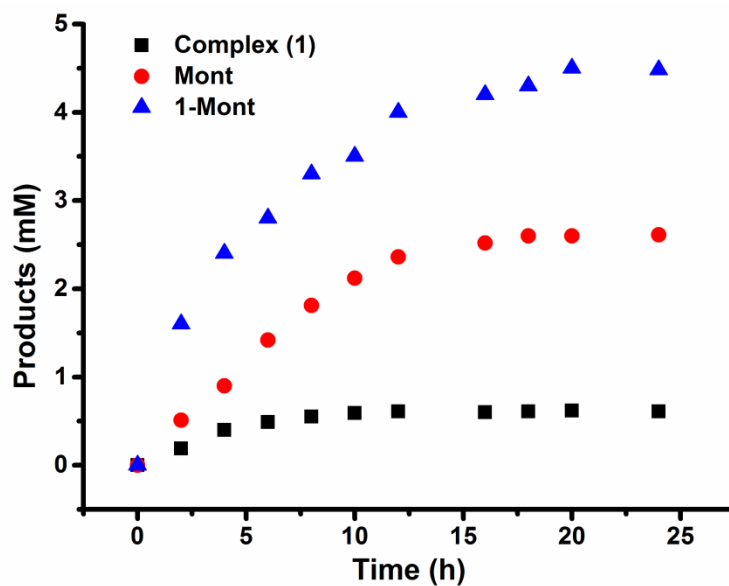

Figure S8. Time course accumulation of oxygenates during oxidation of cyclohexane catalyzed by **1**/H<sub>2</sub>O<sub>2</sub>, **Mont**/H<sub>2</sub>O<sub>2</sub> and **1-Mont**/H<sub>2</sub>O<sub>2</sub>. The data have been analyzed by initial rate method and the rate constants are given in the main text.

### Substrate Limiting Condition\*

\*Reaction condition: cyclohexane (2.5 mM), acetonitrile (2 mL), 20h, under argon at room temperature. Under Identical condition, reactions using 1 gave little or no product. Blank reaction without oxidant (H<sub>2</sub>O<sub>2</sub>) gave no product.

**Table S1:** Effect of H<sub>2</sub>O<sub>2</sub> concentration on cyclohexane oxidation

Catalyst: **1-Mont** [60mg]  
Solvent: Acetonitrile-[2ml],  
Oxidant: H<sub>2</sub>O<sub>2</sub> [Varied],  
Argon atmosphere, Room temperature.  
Substrate: Cyclohexane [2.5mM]

| Entry | H <sub>2</sub> O <sub>2</sub> (mM) | Yield <sup>a</sup> | Product Profile |               |
|-------|------------------------------------|--------------------|-----------------|---------------|
|       |                                    |                    | Cyclohexanol    | Cyclohexanone |
| 1     | 2.5                                | 2.6%               | 2.6%            | 0%            |
| 2     | 5.0                                | 5.0%               | 5.0%            | 0%            |
| 3     | 10.0                               | 5.3%               | 3.5%            | 1.5%          |
| 4     | 20.0                               | 5.7%               | 4.0%            | 1.7%          |
| 5     | 40.0                               | 6.1%               | 4.2%            | 1.9%          |

<sup>a</sup>Yield expressed with respect to substrate concentration

**Table S2:** Effect of **1-Mont** concentration on cyclohexane oxidation

Catalyst: **1-Mont** [Varied]  
Solvent: Acetonitrile-[2ml],  
Oxidant: H<sub>2</sub>O<sub>2</sub>[5mM],  
Argon atmosphere, Room temperature.  
Substrate: Cyclohexane [2.5mM]

| Entry | 1-Mont (mg) | Yield <sup>a</sup> | Product Profile |               |
|-------|-------------|--------------------|-----------------|---------------|
|       |             |                    | Cyclohexanol    | Cyclohexanone |
| 1     | 15          | 2.5%               | 2.5%            | 0%            |
| 2     | 30          | 2.8%               | 2.8%            | 0%            |
| 3     | 45          | 3.8%               | 3.8%            | 0%            |
| 4     | 60          | 5.0%               | 5.0%            | 0%            |
| 5     | 90          | 6.2%               | 6.2%            | 0%            |

<sup>a</sup>Yield expressed with respect to substrate concentration

**Table S3:** Effect of substrate concentration on cyclohexane oxidation

Catalyst: **1-Mont** [60mg]  
Solvent: Acetonitrile-[2ml],  
Oxidant: Hydrogen peroxide-[5mM],  
Argon atmosphere, Room temperature.  
Substrate: Cyclohexane [Varied]

| Entry | Cyclohexane (mM) | Yield <sup>a</sup> | Product Profile |               |
|-------|------------------|--------------------|-----------------|---------------|
|       |                  |                    | Cyclohexanol    | Cyclohexanone |
| 1     | 2.0              | 4.5%               | 4.5%            | 0%            |
| 2     | 2.5              | 5.0%               | 5.0%            | 0%            |
| 3     | 5.0              | 5.9%               | 5.9%            | 0%            |
| 4     | 7.5              | 6.8%               | 6.8%            | 0%            |
| 5     | 10.0             | 7.2%               | 7.2%            | 0%            |

<sup>a</sup>Yield expressed with respect to substrate concentration
